# Supplementary material
Source: publisher figshare collection journal article supplement (https://acs.figshare.com/ndownloader/files/3881479)
Supplement: Supplementary file 1 [file 3881479]

## Sheet: Explanation
This excel file belongs to the publication "Charge Anisotropy: Where Multipoles Matter Most" by Kramer, Spinn, and Liedl.
Contact: Christian.Kramer@uibk.ac.at
The sheet "atomic errors" contains the errors in reproducing the quantummechanical ESP for both the point charge and the multipole approximation, assigned to the individual atoms of all reference compounds.
The atom type assignment can be found in figure 1 of the corresponding publication.
The sheet "level of theory comparison" contains the same errors for two reference compounds, calculated at the M062x aug-cc-PVDZ level and the CCSD(T) aug-cc-PVTZ level.
It shows that the errors for fitting the charge model to the QM-ESP from the lower level of theory (M062x aug-cc-PVDZ) are comparable to the errors obtained when fitting the charge model to the QM-ESP from the higher level of theory (CCSD(T) aug-cc-PVTZ)).

## Sheet: atomic errors
Molecule	Atom Type	Number of Gridpoints assiciated with the atom type	RMSE [V] for the MTP solution	RMAE for the MTP solution	R2 for the MTP solution	RMSE [V] for the point charge solution	RMAE for the point charge solution	R2 for the point charge solution
(R)-N-methylpyrrolidine-2-carboxamide	H1	855	0.00329562	0.012	0.99979	0.031187	0.1215	0.97539
(R)-N-methylpyrrolidine-2-carboxamide	H2	1947	0.00348642	0.0138	0.99553	0.0295478	0.1283	0.65171
(R)-N-methylpyrrolidine-2-carboxamide	H3	3162	0.00252375	0.0107	0.99979	0.0181086	0.083	0.98058
(R)-N-methylpyrrolidine-2-carboxamide	H4	598	0.00278827	0.0071	0.99991	0.0166255	0.0523	0.99855
(R)-N-methylpyrrolidine-2-carboxamide	H5	948	0.00416289	0.0126	0.99981	0.0226747	0.0777	0.99654
(R)-N-methylpyrrolidine-2-carboxamide	H6	2467	0.00433634	0.0179	0.99841	0.0181996	0.071	0.96884
(R)-N-methylpyrrolidine-2-carboxamide	N2	22	0.00375527	0.0139	0.99693	0.0121114	0.0444	0.96125
(R)-N-methylpyrrolidine-2-carboxamide	O	1201	0.00347341	0.0031	0.99988	0.0248082	0.0262	0.99016
2-methylprop-1-ene	C1	102	0.00241534	0.0096	0.99915	0.0137592	0.0567	0.99424
2-methylprop-1-ene	H1	6391	0.00193401	0.0225	0.99946	0.00522529	0.0624	0.99443
2-methylprop-1-ene	H2	2809	0.00181693	0.0152	0.99967	0.0064915	0.0638	0.99349
3-methylindole	C1	149	0.00319588	0.0105	0.99823	0.00817834	0.0283	0.98601
3-methylindole	C2	32	0.00207711	0.0042	0.99894	0.005776	0.0122	0.98959
3-methylindole	C3	147	0.00186896	0.0032	0.99922	0.0105156	0.0192	0.98821
3-methylindole	C4	640	0.00260614	0.0046	0.99936	0.0143836	0.0272	0.99157
3-methylindole	C5	188	0.0030311	0.006	0.99937	0.0197043	0.0516	0.99746
3-methylindole	H1	1081	0.0027926	0.006	0.99992	0.0110533	0.0245	0.99841
3-methylindole	H2	1363	0.00221153	0.0084	0.99989	0.0117602	0.0486	0.99806
3-methylindole	H3	3380	0.00261481	0.0247	0.99961	0.00692513	0.0662	0.9971
3-methylindole	H4	5277	0.00327394	0.0192	0.99964	0.0108582	0.0686	0.99558
3-methylindole	N	150	0.00568928	0.0206	0.99911	0.0194095	0.0769	0.99194
4h-thiopyran	C1	350	0.00267986	0.0074	0.99917	0.0246478	0.0697	0.97931
4h-thiopyran	C2	58	0.00186463	0.0081	0.99972	0.0149734	0.0565	0.94211
4h-thiopyran	H1	3363	0.00282296	0.018	0.99967	0.0269981	0.1801	0.96414
4h-thiopyran	H2	2518	0.00189498	0.011	0.99984	0.0234119	0.1424	0.96906
4h-thiopyran	H3	2377	0.00190365	0.0098	0.99989	0.0280995	0.1625	0.96851
4h-thiopyran	S	1567	0.00376828	0.0116	0.99756	0.0301246	0.0953	0.88709
acetaldehyde	C1	23	0.0025064	0.1088	0.99861	0.00318721	0.1137	0.98539
acetaldehyde	H1	1545	0.00212481	0.0075	0.99991	0.0239193	0.0893	0.98482
acetaldehyde	H2	3939	0.00191233	0.0065	0.99992	0.0175665	0.0591	0.99116
acetaldehyde	O	1633	0.00256278	0.0034	0.99991	0.0250684	0.0395	0.9872
acetamide	C1	29	0.00194702	0.0117	0.99947	0.0118512	0.0766	0.98979
acetamide	H1	1999	0.00453148	0.0092	0.99987	0.0184381	0.0389	0.99689
acetamide	H2	3655	0.00313517	0.012	0.99986	0.0138503	0.0542	0.99701
acetamide	N	99	0.00199038	0.0351	0.99914	0.00706823	0.1344	0.98762
acetamide	O	1339	0.00375961	0.0037	0.99987	0.0169854	0.0168	0.99546
acetic acid	C1	28	0.0036512	0.1876	0.99554	0.00881578	0.4024	0.93461
acetic acid	H1	1123	0.00277092	0.0108	0.9999	0.0274447	0.1164	0.98981
acetic acid	H2	3919	0.00206843	0.01	0.99987	0.0094272	0.0484	0.99466
acetic acid	O1	1381	0.00267552	0.0041	0.99991	0.0219115	0.0381	0.99099
acetic acid	O2	577	0.00281428	0.0205	0.99912	0.0183948	0.1515	0.97797
acetone	H	6925	0.00207277	0.0076	0.99992	0.0131955	0.0503	0.99538
acetone	O	1330	0.00299207	0.0036	0.99989	0.0199688	0.0243	0.9928
acetonitrile	C1	133	0.0016825	0.0207	0.99955	0.00412386	0.0461	0.99898
acetonitrile	H	4549	0.00130957	0.0031	0.99997	0.00513423	0.0126	0.9992
acetonitrile	N	2480	0.00169551	0.0021	0.99997	0.00716363	0.0119	0.9992
amidine	C1	27	0.00266251	0.007	0.99983	0.0421536	0.1341	0.99607
amidine	H1	1018	0.00358182	0.0094	0.99989	0.0210009	0.0644	0.99493
amidine	H2	1836	0.00464856	0.0114	0.99989	0.0411432	0.11	0.98638
amidine	H3	3405	0.00344739	0.0134	0.99958	0.018334	0.0651	0.98786
amidine	N1	745	0.0044751	0.0047	0.99976	0.0367592	0.0504	0.97456
amidine	N2	167	0.00400678	0.0085	0.99955	0.0522919	0.129	0.89967
aziridine	H1	1034	0.00246304	0.0071	0.99994	0.0481811	0.1803	0.9862
aziridine	H2	5631	0.00194702	0.0113	0.9999	0.0403236	0.2507	0.96053
aziridine	N	484	0.00316119	0.0038	0.9997	0.0789301	0.1122	0.88789
benzene	C	1004	0.00118816	0.0029	0.99994	0.0225273	0.0629	0.99145
benzene	H	8817	0.00143099	0.0118	0.99993	0.00960934	0.0834	0.99617
benzonitrile	C1	320	0.0024934	0.0115	0.99908	0.00918437	0.0469	0.99606
benzonitrile	C2	200	0.00259747	0.0253	0.99705	0.0132215	0.0985	0.62188
benzonitrile	C3	821	0.00136161	0.028	0.99908	0.0195179	0.424	0.92934
benzonitrile	H	7307	0.00210746	0.0063	0.99988	0.00868569	0.0294	0.99748
benzonitrile	N	2191	0.00197303	0.0024	0.99995	0.0112051	0.0164	0.99655
bromobenzene	Br	3119	0.00243269	0.0097	0.99831	0.044235	0.2079	0.3095
bromobenzene	C1	243	0.00315252	0.0098	0.99824	0.0310482	0.0972	0.78999
bromobenzene	C2	826	0.00196003	0.009	0.99868	0.027913	0.1327	0.98915
bromobenzene	H	7560	0.00218118	0.0124	0.99982	0.0185725	0.1052	0.98555
bromomethane	Br	3444	0.00189498	0.0063	0.99814	0.0368155	0.1468	0.33618
bromomethane	H	4746	0.00170418	0.0064	0.99992	0.0194268	0.0782	0.9868
chlorobenzene	C1	218	0.00310916	0.0102	0.99811	0.0276832	0.0924	0.87409
chlorobenzene	C2	825	0.00221587	0.0101	0.99803	0.0229436	0.1072	0.99061
chlorobenzene	Cl	2451	0.00256711	0.0089	0.99765	0.0381121	0.1582	0.34741
chlorobenzene	H	7390	0.00224622	0.0132	0.99978	0.0152813	0.0862	0.99007
chloromethane	Cl	2712	0.00195135	0.0055	0.99842	0.0312433	0.107	0.61916
chloromethane	H	4510	0.00157843	0.0058	0.99993	0.0175882	0.0732	0.99051
cis-2-butene	C1	56	0.000849923	0.0033	0.99976	0.0433157	0.186	0.94806
cis-2-butene	H1	2609	0.00259313	0.0274	0.99914	0.0313474	0.3808	0.94326
cis-2-butene	H2	6606	0.00329562	0.0568	0.99702	0.0272843	0.4822	0.81626
cyclohexane	H	10189	0.00183861	0.0796	0.99646	0.0209532	0.9512	0.08072
dimethylamine	H1	859	0.00504316	0.0166	0.99957	0.06877	0.2725	0.98909
dimethylamine	H2	6769	0.00515157	0.0477	0.99806	0.0436366	0.4211	0.88976
dimethylamine	N	204	0.0046659	0.0058	0.99945	0.113079	0.1734	0.79857
dimethylsulfide	H	7372	0.00457918	0.0271	0.99903	0.032735	0.1825	0.96964
dimethylsulfide	S	1344	0.00925809	0.0232	0.9818	0.0543343	0.1378	0.81012
dimethylsulfone	H	6490	0.00267986	0.0056	0.99993	0.0174885	0.044	0.99698
dimethylsulfone	O	2187	0.00367288	0.0038	0.99983	0.0160922	0.0185	0.99534
dimethylsulfoxide	H	6796	0.00486971	0.013	0.99966	0.0277135	0.0719	0.99374
dimethylsulfoxide	O	1279	0.00718532	0.0063	0.9993	0.0328044	0.0288	0.98746
dimethylsulfoxide	S	587	0.0090803	0.0533	0.99773	0.05054	0.3005	0.95121
ethane	H	7225	0.00116214	0.043	0.9986	0.0237024	0.9905	0.00229
ethanol	H1	2275	0.0045705	0.0272	0.99924	0.0558477	0.3524	0.92247
ethanol	H2	3394	0.00441873	0.0286	0.9988	0.0292963	0.184	0.94716
ethanol	H3	825	0.00702487	0.0197	0.99948	0.0501064	0.1575	0.9832
ethanol	O	623	0.00518626	0.0067	0.99933	0.0556656	0.0844	0.92364
ethene	C	279	0.00121418	0.0045	0.99971	0.00426262	0.022	0.99957
ethene	H	6767	0.00132692	0.0142	0.99986	0.0163393	0.1835	0.95856
fluorobenzene	C1	186	0.00343004	0.012	0.9953	0.00976977	0.0396	0.99168
fluorobenzene	C2	841	0.00338668	0.0152	0.99524	0.0141625	0.06	0.97848
fluorobenzene	F	1364	0.00399811	0.0104	0.9982	0.0085079	0.0222	0.99084
fluorobenzene	H	7324	0.0029834	0.0195	0.99948	0.00789648	0.0504	0.99719
fluoromethane	F	1451	0.00186896	0.0036	0.99987	0.0189628	0.045	0.99635
fluoromethane	H	4434	0.00137462	0.0058	0.99993	0.0246044	0.1294	0.98256
furan	C1	332	0.00265818	0.0101	0.99827	0.0323101	0.1276	0.89055
furan	C2	326	0.00189064	0.006	0.99873	0.0172933	0.0526	0.95855
furan	H1	3699	0.00205543	0.0145	0.99981	0.0178787	0.1408	0.97807
furan	H2	3455	0.00273189	0.0194	0.9995	0.0195829	0.155	0.97566
furan	O	950	0.00236331	0.0074	0.99888	0.0438361	0.1534	0.57448
hexazine	N	5985	0.00214215	0.0105	0.99995	0.197963	1	0.53785
imidazole	C1	149	0.0026495	0.0104	0.99942	0.0436366	0.1947	0.97461
imidazole	C2	336	0.00300942	0.0099	0.99981	0.03512	0.1199	0.96488
imidazole	H1	1216	0.00366421	0.0051	0.99986	0.0165692	0.0253	0.99599
imidazole	H2	1830	0.00286198	0.0101	0.99991	0.0208448	0.0688	0.99487
imidazole	H3	3536	0.00413253	0.0149	0.99979	0.0349813	0.1368	0.98558
imidazole	N1	151	0.00343438	0.0359	0.9996	0.0379907	0.4295	0.98921
imidazole	N2	1086	0.00363385	0.0043	0.99968	0.0597244	0.0757	0.93161
isoquinoline	C1	320	0.00440139	0.015	0.99347	0.0639567	0.2407	0.91345
isoquinoline	C2	840	0.00352544	0.0177	0.99502	0.0204155	0.1097	0.9489
isoquinoline	C3	376	0.00299207	0.0113	0.99297	0.0320499	0.1239	0.9056
isoquinoline	H1	3029	0.00404581	0.0194	0.9995	0.0270848	0.1401	0.97681
isoquinoline	H2	6622	0.00485236	0.0228	0.99859	0.0290925	0.1489	0.96111
isoquinoline	N	857	0.00287499	0.0039	0.99972	0.0755521	0.132	0.82946
methanesulfonamide	H1	1658	0.00362952	0.0078	0.99987	0.0325963	0.0802	0.98183
methanesulfonamide	H2	3482	0.00235897	0.0072	0.99993	0.0198474	0.0571	0.98952
methanesulfonamide	N	129	0.00327394	0.021	0.99744	0.0413817	0.3471	0.98638
methanesulfonamide	O	2193	0.00347341	0.0042	0.99984	0.0210573	0.0286	0.98875
methanesulfonic acid	H1	885	0.00768833	0.0149	0.99941	0.0551062	0.1145	0.97635
methanesulfonic acid	H2	3509	0.00284898	0.0061	0.99986	0.0301983	0.0719	0.98111
methanesulfonic acid	O1	2386	0.00501715	0.0073	0.99951	0.037427	0.0613	0.97257
methanesulfonic acid	O2	529	0.00475696	0.0155	0.99966	0.0353542	0.1332	0.98758
methanethiol	H1	1635	0.00359049	0.0172	0.99964	0.0648456	0.3826	0.91123
methanethiol	H2	4160	0.00303977	0.0154	0.99956	0.0584278	0.2787	0.84226
methanethiol	S	1654	0.00380731	0.0099	0.99722	0.0681282	0.1933	0.19014
methyl sulfate	H1	889	0.0079832	0.0136	0.99908	0.0551582	0.1024	0.98219
methyl sulfate	H2	3620	0.00345173	0.0118	0.99965	0.0270197	0.095	0.97509
methyl sulfate	O1	465	0.00672133	0.0372	0.99916	0.0456096	0.2578	0.94601
methyl sulfate	O2	2239	0.00572831	0.0099	0.99904	0.0396255	0.078	0.96934
methyl sulfate	O3	693	0.0065392	0.0202	0.99835	0.0447424	0.1545	0.96654
methyl-cyclobutane	H1	3089	0.00243702	0.0809	0.99473	0.0133386	0.3843	0.78467
methyl-cyclobutane	H2	743	0.00290101	0.0453	0.98527	0.0249556	0.4936	0.38024
methyl-cyclobutane	H3	5968	0.00218985	0.054	0.99735	0.0285982	0.7528	0.33678
methyl-cyclopropane	H1	3243	0.00266685	0.0764	0.99563	0.0224796	0.642	0.64122
methyl-cyclopropane	H2	989	0.0035558	0.0558	0.99466	0.0244526	0.4398	0.89429
methyl-cyclopropane	H3	4757	0.00243269	0.0358	0.99863	0.0270111	0.4288	0.79612
methylacetate	H1	3896	0.0017779	0.0098	0.99987	0.0150081	0.0789	0.9884
methylacetate	H2	3815	0.00237198	0.0137	0.99977	0.0213261	0.1419	0.97793
methylacetate	O1	1006	0.00301376	0.0039	0.99982	0.0190712	0.0274	0.99241
methylacetate	O2	341	0.00169551	0.0151	0.99958	0.0351894	0.2947	0.9022
methylamine	H1	1856	0.00473962	0.0149	0.9997	0.0542043	0.1945	0.95542
methylamine	H2	3858	0.00559821	0.046	0.99833	0.055336	0.4732	0.88915
methylamine	N	270	0.00660425	0.0074	0.99923	0.107637	0.1568	0.89589
methylguanidine	C1	47	0.00300942	0.0086	0.99944	0.0307663	0.0923	0.94698
methylguanidine	H1	1008	0.00393306	0.0087	0.9999	0.0316032	0.0825	0.99248
methylguanidine	H2	1724	0.00478298	0.0121	0.99986	0.0361694	0.1054	0.98937
methylguanidine	H3	711	0.00363385	0.0085	0.99988	0.039001	0.099	0.97988
methylguanidine	H4	3382	0.00376828	0.0123	0.99966	0.0388059	0.1367	0.94775
methylguanidine	N1	724	0.00486537	0.0045	0.99975	0.0354192	0.0438	0.9749
methylguanidine	N2	115	0.00297473	0.007	0.9995	0.0544341	0.1368	0.92113
methylguanidine	N3	153	0.00300942	0.0145	0.99892	0.0328781	0.1575	0.96572
n-(methylsulfonyl)acetamide	H1	615	0.00443608	0.0077	0.99978	0.0250163	0.0488	0.9966
n-(methylsulfonyl)acetamide	H2	3141	0.0035558	0.0108	0.99977	0.0193314	0.0681	0.99421
n-(methylsulfonyl)acetamide	H3	3557	0.00255844	0.0058	0.9999	0.0187807	0.0395	0.99201
n-(methylsulfonyl)acetamide	O1	2188	0.0041282	0.0051	0.99968	0.0314688	0.0452	0.98149
n-(methylsulfonyl)acetamide	O2	766	0.00478732	0.0072	0.99971	0.0357878	0.0623	0.98791
n-methylacetamide	C1	28	0.00324792	0.0154	0.99924	0.0157453	0.0706	0.94921
n-methylacetamide	H1	3181	0.0026495	0.0098	0.99991	0.0239626	0.1001	0.99216
n-methylacetamide	H2	3188	0.00388536	0.0094	0.99845	0.0284334	0.0693	0.90519
n-methylacetamide	H3	1006	0.003842	0.0106	0.99985	0.0433807	0.1475	0.99398
n-methylacetamide	N	44	0.0022549	0.0208	0.99936	0.0360003	0.3697	0.95594
n-methylacetamide	O	1382	0.00340403	0.0032	0.99989	0.0244049	0.0242	0.99259
nitrobenzene	C1	193	0.00549848	0.1413	0.96763	0.00816099	0.1758	0.68853
nitrobenzene	C2	819	0.00192967	0.041	0.99753	0.0160705	0.3427	0.88707
nitrobenzene	H	6777	0.00372925	0.0112	0.99959	0.00946623	0.0304	0.99746
nitrobenzene	N	168	0.00431466	0.0304	0.99926	0.026417	0.1572	0.97372
nitrobenzene	O	2212	0.00375961	0.0057	0.99976	0.0310872	0.0495	0.98092
nitromethane	H	3858	0.00244136	0.0052	0.99987	0.0179611	0.036	0.98969
nitromethane	N	38	0.00112745	0.0143	0.99998	0.0327394	0.509	0.98082
nitromethane	O	2490	0.00439705	0.0076	0.9997	0.0386238	0.0725	0.97127
oxiran	H	6005	0.00173454	0.0082	0.99988	0.0255801	0.1408	0.98276
oxiran	O	1113	0.0025411	0.0039	0.9998	0.0431856	0.0722	0.9716
oxirane	C	8	0.00107541	0.0075	0.99639	0.0121244	0.0786	0.00101
p-cresol	C2	46	0.00448811	0.0098	0.99523	0.00795285	0.0202	0.99656
p-cresol	C3	605	0.00381598	0.0098	0.99864	0.0168033	0.0541	0.97898
p-cresol	C4	162	0.00255844	0.0058	0.99816	0.010637	0.0297	0.99421
p-cresol	H1	3428	0.00347341	0.0367	0.99863	0.00956163	0.101	0.99081
p-cresol	H2	4890	0.00297907	0.0153	0.99977	0.0267856	0.1633	0.98547
p-cresol	H3	949	0.00607521	0.0176	0.9996	0.0459045	0.1351	0.99047
p-cresol	O	708	0.0039851	0.0077	0.99922	0.0369586	0.085	0.96264
propyne	C1	935	0.00141798	0.0043	0.99966	0.00848622	0.0299	0.99132
propyne	C2	143	0.000728505	0.0025	0.9998	0.0110707	0.0441	0.99748
propyne	H1	4549	0.00150037	0.0084	0.99991	0.0078401	0.0482	0.99642
propyne	H2	2571	0.00143966	0.0095	0.99995	0.00717664	0.0521	0.99911
pyridine	C1	322	0.00191666	0.007	0.99953	0.0392872	0.1645	0.98501
pyridine	C2	491	0.00117515	0.0059	0.99976	0.0157192	0.0955	0.97158
pyridine	H1	3387	0.00185162	0.0084	0.99994	0.0245784	0.1313	0.98267
pyridine	H2	4499	0.00175622	0.0074	0.99988	0.0252765	0.1199	0.96969
pyridine	N	814	0.00243702	0.0032	0.99981	0.06253	0.1118	0.91353
pyrrole	C1	321	0.00338235	0.0085	0.99933	0.0309268	0.0828	0.97086
pyrrole	C2	330	0.00199038	0.0033	0.99964	0.0250597	0.0468	0.97203
pyrrole	H1	1207	0.00256711	0.0058	0.99994	0.0177963	0.0421	0.99607
pyrrole	H2	3304	0.00219419	0.0111	0.9999	0.0100083	0.0584	0.99724
pyrrole	H3	3399	0.00254977	0.013	0.99963	0.0110186	0.0645	0.9945
pyrrole	N	162	0.00349075	0.0107	0.99981	0.0387625	0.14	0.9974
pyrrolidine	H1	902	0.00367288	0.0123	0.9998	0.0484456	0.1882	0.99194
pyrrolidine	H2	3973	0.00415855	0.0366	0.99871	0.0332901	0.3515	0.9196
pyrrolidine	H3	3948	0.00284898	0.0327	0.99941	0.035146	0.4839	0.9198
pyrrolidine	N	147	0.00493042	0.0063	0.99896	0.114497	0.1733	0.87976
quinoline	C1	157	0.00487405	0.0179	0.99718	0.0477127	0.2007	0.99461
quinoline	C2	1008	0.00489139	0.0182	0.99602	0.0150081	0.0563	0.95741
quinoline	C3	200	0.00302243	0.0092	0.99699	0.0165128	0.0453	0.94956
quinoline	C4	189	0.00222454	0.0044	0.99846	0.0279434	0.0709	0.85839
quinoline	H1	1685	0.00256278	0.0118	0.99987	0.0233208	0.1305	0.99036
quinoline	H2	8324	0.00484369	0.0231	0.99935	0.0200946	0.101	0.99089
quinoline	N	640	0.00318287	0.0052	0.99959	0.0505617	0.0955	0.90976
s-methyl thioacetate	C1	6	0.00454448	0.0544	0.97179	0.0281992	0.3201	0.63858
s-methyl thioacetate	H1	3960	0.00238499	0.0123	0.99974	0.0239236	0.1351	0.96445
s-methyl thioacetate	H2	3831	0.0024934	0.0166	0.99973	0.0412256	0.2907	0.90522
s-methyl thioacetate	O	947	0.0030311	0.0048	0.99978	0.0257145	0.0468	0.98812
s-methyl thioacetate	S	976	0.00272322	0.0222	0.99555	0.0437754	0.3861	0.20666
s-triazine	C	473	0.0014917	0.025	0.99975	0.0142232	0.2131	0.65203
s-triazine	H	5655	0.00168684	0.0127	0.99989	0.0149387	0.1102	0.98153
s-triazine	N	2669	0.00215516	0.0082	0.99981	0.0142969	0.0649	0.99432
tetrahydrofuran	H1	4551	0.00272322	0.0169	0.99973	0.0345823	0.2395	0.95462
tetrahydrofuran	H2	3899	0.0022072	0.0117	0.9982	0.0334896	0.2002	0.5748
tetrahydrofuran	O	570	0.00244136	0.0031	0.9998	0.0445299	0.0688	0.99509
tetrahydrothiophene	H1	4669	0.00287933	0.017	0.99972	0.0352805	0.2265	0.94866
tetrahydrothiophene	H2	3774	0.00221153	0.0099	0.99953	0.0291185	0.1441	0.87133
tetrahydrothiophene	S	1347	0.00379863	0.0078	0.99759	0.0484369	0.1033	0.5863
tetrazole - a	C1	24	0.00119683	0.0183	0.99969	0.0326526	0.5677	0.99036
tetrazole - a	H1	991	0.00603185	0.007	0.99976	0.0462341	0.0557	0.98409
tetrazole - a	H2	3779	0.00447077	0.0094	0.99972	0.031716	0.0648	0.98464
tetrazole - a	N1	147	0.00274924	0.0136	0.99969	0.0299988	0.1641	0.99396
tetrazole - a	N2	2076	0.00556352	0.007	0.99966	0.0806212	0.1121	0.91987
tetrazole - a	N3	831	0.00402846	0.0051	0.99984	0.0690996	0.0977	0.91218
tetrazole - b	C1	30	0.00188631	0.0362	0.99563	0.0366421	0.7716	0.77126
tetrazole - b	H1	1142	0.00368589	0.0064	0.99989	0.0507916	0.1016	0.96844
tetrazole - b	H2	3926	0.00230693	0.0151	0.99983	0.0315902	0.2004	0.93482
tetrazole - b	N1	1604	0.00310916	0.007	0.99988	0.0620227	0.1586	0.95359
tetrazole - b	N2	999	0.00412386	0.0082	0.99977	0.0943804	0.2255	0.80451
tetrazole - b	N3	129	0.00279694	0.0408	0.9986	0.0883833	1.6409	0.71835
thiazole	C1	187	0.00296606	0.0126	0.99801	0.0361737	0.1908	0.98377
thiazole	C2	156	0.00181259	0.0071	0.99921	0.0365597	0.1724	0.96431
thiazole	C3	189	0.00256278	0.0146	0.998	0.0188154	0.1065	0.96073
thiazole	H1	2038	0.00287499	0.0141	0.99978	0.0159187	0.0871	0.99237
thiazole	H2	1820	0.00205543	0.0105	0.99991	0.0269113	0.162	0.97907
thiazole	H3	1845	0.00199472	0.0073	0.99983	0.035545	0.1446	0.91829
thiazole	N	995	0.00256278	0.0039	0.99976	0.0515461	0.1033	0.92298
thiazole	S	1878	0.00273189	0.0282	0.99891	0.0262695	0.318	0.89372
thiophene	C1	364	0.00263216	0.0072	0.99955	0.0274447	0.0843	0.98795
thiophene	C2	312	0.00119683	0.0034	0.9996	0.0276485	0.0929	0.99003
thiophene	H1	3658	0.00229826	0.0144	0.99974	0.0209098	0.1291	0.97235
thiophene	H2	3253	0.00189064	0.013	0.99983	0.0100213	0.0728	0.99483
thiophene	S	1799	0.00275791	0.0141	0.99898	0.0229349	0.1479	0.93089
trans-2-butene	C1	42	0.00181259	0.007	0.99948	0.0231387	0.0962	0.99851
trans-2-butene	H1	2011	0.00183861	0.0186	0.99963	0.0174841	0.2303	0.95607
trans-2-butene	H2	7349	0.00171719	0.0304	0.99947	0.0151859	0.2955	0.93626
trimethylamine	H	8955	0.00422793	0.0511	0.99813	0.0268203	0.3249	0.9207
trimethylamine	N	177	0.00385067	0.0053	0.99915	0.093305	0.1705	0.97697
trimethylene urea	C1	56	0.0030788	0.0081	0.99994	0.025051	0.0541	0.9875
trimethylene urea	H1	1933	0.00287499	0.0074	0.99995	0.0317637	0.0851	0.99336
trimethylene urea	H2	3903	0.00275358	0.0067	0.99956	0.0265861	0.077	0.94569
trimethylene urea	H3	1960	0.0023026	0.0062	0.99993	0.0183774	0.0505	0.99208
trimethylene urea	N	83	0.00181259	0.0047	0.99979	0.0447207	0.1225	0.95472
trimethylene urea	O	1390	0.00343872	0.0029	0.99991	0.0194528	0.0182	0.99565
urea	C	177	0.00399377	0.0153	0.99943	0.0216774	0.088	0.99183
urea	H	3982	0.00429298	0.0082	0.99993	0.0143966	0.0295	0.99868
urea	N	240	0.00277959	0.0172	0.99902	0.0131218	0.0912	0.98619
urea	O	1449	0.00358182	0.0033	0.99993	0.016387	0.0159	0.99604
water	H	1896	0.00464856	0.0124	0.99983	0.0736137	0.1998	0.94509
water	O	793	0.00472227	0.0062	0.99963	0.0631458	0.0888	0.88989

## Sheet: level of theory comparison
Molecule	Level of Theory	Atom Type	RMSE [V] for the MTP solution	RMAE for the MTP solution	R2 for the MTP solution	RMSE [V] for the point charge solution	RMAE for the point charge solution	R2 for the point charge solution
acetaldehyde	M062X aug-cc-pVDZ	C1	0.00283597	0.1095	0.99896	0.00280128	0.0862	0.99319
acetaldehyde	CCSD(T) aug-cc-pVTZ	C1	0.00294004	0.096	0.99918	0.00263649	0.069	0.99457
acetaldehyde	M062X aug-cc-pVDZ	H1	0.00171719	0.0065	0.99995	0.0238499	0.0905	0.98469
acetaldehyde	CCSD(T) aug-cc-pVTZ	H1	0.00141365	0.004	0.99997	0.0238065	0.0761	0.98907
acetaldehyde	M062X aug-cc-pVDZ	H2	0.00162179	0.0054	0.99995	0.0176532	0.0595	0.99109
acetaldehyde	CCSD(T) aug-cc-pVTZ	H2	0.0013009	0.0037	0.99997	0.0195179	0.0591	0.99239
acetaldehyde	M062X aug-cc-pVDZ	O	0.00231994	0.0033	0.99993	0.0247995	0.0393	0.98748
acetaldehyde	CCSD(T) aug-cc-pVTZ	O	0.0016825	0.002	0.99997	0.0232515	0.0315	0.99159
dimethylsulfide	M062X aug-cc-pVDZ	H	0.00457918	0.0271	0.99903	0.032735	0.1825	0.96964
dimethylsulfide	CCSD(T) aug-cc-pVTZ	H	0.00435802	0.0241	0.99913	0.0365944	0.203	0.96373
dimethylsulfide	M062X aug-cc-pVDZ	S	0.00925809	0.0232	0.9818	0.0543343	0.1378	0.81012
dimethylsulfide	CCSD(T) aug-cc-pVTZ	S	0.00934048	0.0219	0.98404	0.0602361	0.1436	0.78756
